# Supplementary material for: Artificial synapses based on biopolymer electrolyte-coupled SnO2nanowire transistors
Source: Royal Society of Chemistry journal article supplement (doi:10.1039/c6tc03731c), 2016-01-01
Supplement: c6tc03731c1.pdf [file c6tc03731c1.pdf]

## Supporting information

### Artificial Synapses Based on Biopolymer Electrolyte Coupled SnO<sub>2</sub> Nanowire Transistors

Guangyang Gou<sup>a,b</sup>, Jia Sun<sup>a\*</sup>, Chuan Qian<sup>a</sup>, Yinke He<sup>a</sup>, Ling-an Kong<sup>a</sup>, Yan Fu<sup>b</sup>, Guozhang Dai<sup>a,b\*</sup>, Junliang Yang<sup>a</sup>, and Yongli Gao<sup>a,c</sup>

- a. Hunan Key Laboratory for Super Microstructure and Ultrafast Process, School of Physics and Electronics, Central South University, Changsha, Hunan 410083, P. R. China*
- b. Department of Applied Physics, School of Physics and Electronics, Central South University, Changsha 410083, Hunan, P. R. China*
- c. Department of Physics and Astronomy, University of Rochester, Rochester, NY 14627, USA*

\* Corresponding authors: [jiasun@csu.edu.cn](mailto:jiasun@csu.edu.cn) (J. Sun)  
[gzdai2011@csu.edu.cn](mailto:gzdai2011@csu.edu.cn) (G. Dai)

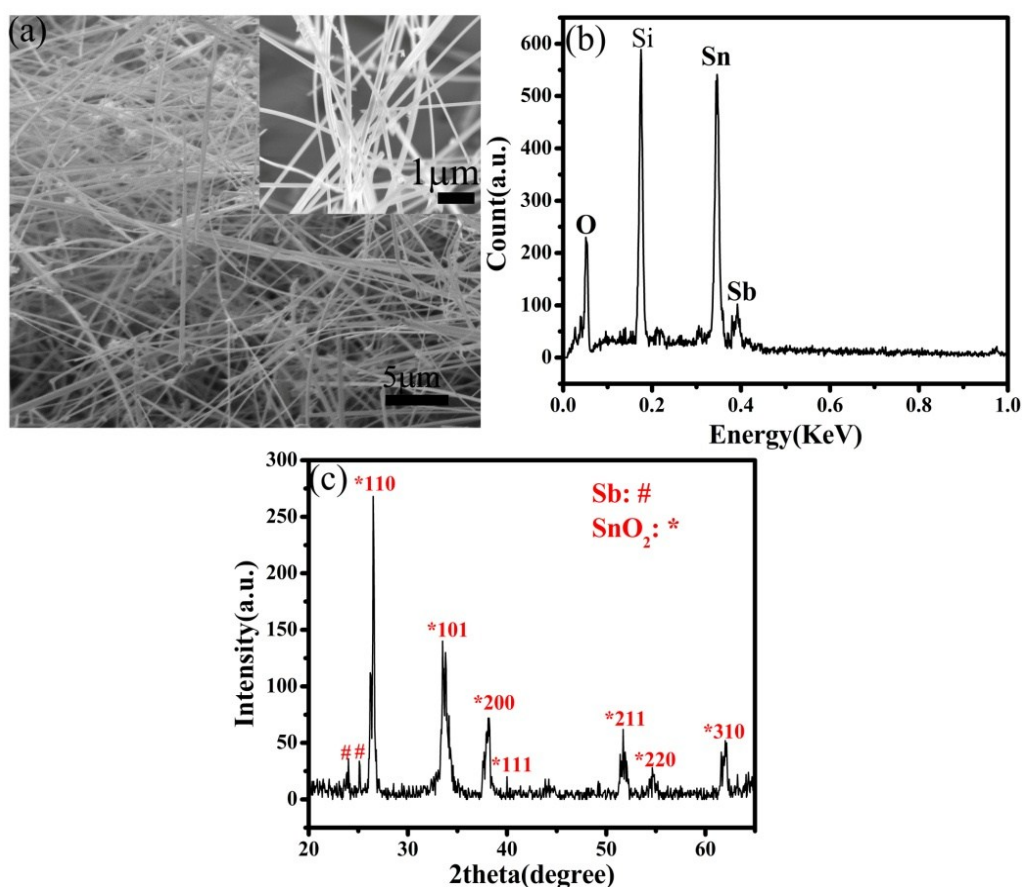

**Figure S1: (a) SEM images of Sb-doped SnO<sub>2</sub> nanowires. (b) EDS spectrum of SnO<sub>2</sub> nanowires. (c) XRD result of the prepared products.**

The typical SEM image in Figure S1(a) shows the as-grown Sb-doped SnO<sub>2</sub> nanowires deposited on the Si substrate by using Au nanocluster catalyst. As-synthesized nanowires are straight with the diameter in the range of 100 nm-400 nm and the lengths are typically greater up to several hundreds of micrometers. The EDS image of product is shown in Figure S1(b), which indicates that Sn, O, and Sb are present. Furthermore, the structure of as-deposited SnO<sub>2</sub> nanowires is determined by the XRD in Figure S1(c). All of the SnO<sub>2</sub> diffraction peak can be assigned to the tetragonal structure ( $a=4.7421\text{\AA}$ ,  $c=3.1901\text{\AA}$  and JCPDS card is 77-449).

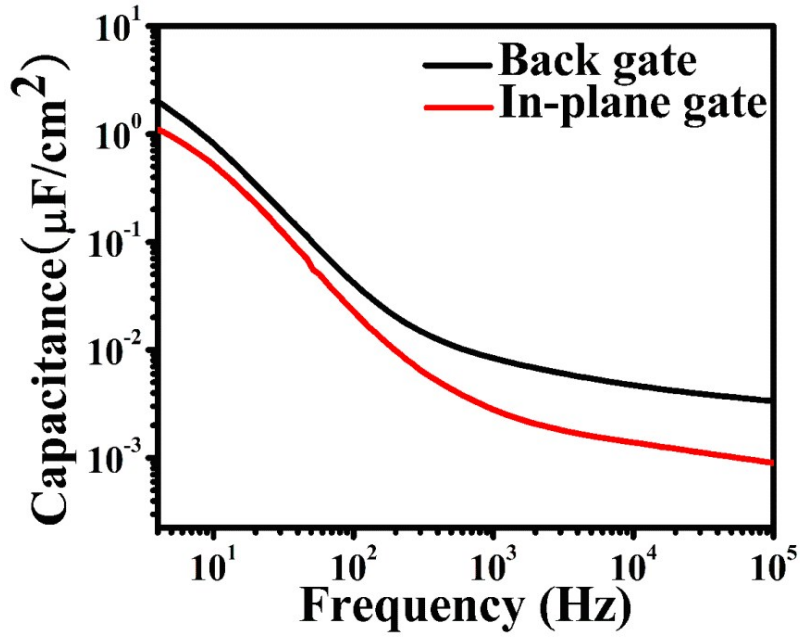

**Figure S2: The specific capacitance-frequency curves of the chitosan-based proton conducting film measured with back gate and in-plane-gate structures.**

Field-effect mobility of our devices in the saturation region can be estimated by  $I_{ds} = (\mu C)/(2L^2)(V_{gs} - V_{th})^2$ , where  $L = 7.0 \mu m$  is the channel length. The gate capacitance per unit length can be estimated as  $C_g = C/L = 2\pi\epsilon_0\epsilon_r/\ln(1 + 2L_D/d)$ , where  $\epsilon_r$ <sup>[1]</sup> is the dielectric constant of the chitosan film,  $\epsilon_0$  is the permittivity of free space, and  $d = 300$  nm is the diameter of the nanowire<sup>[2]</sup>. Debye length  $L_D$  is defined as the typical distance required for screening the surplus charge by the mobile carriers present in a material<sup>[3]</sup>. The mobility value of the in-plane gate and back-gate nanowire transistors is calculated to be  $36.8 \text{ cm}^2/\text{Vs}$  and  $23.5 \text{ cm}^2/\text{Vs}$ , respectively.

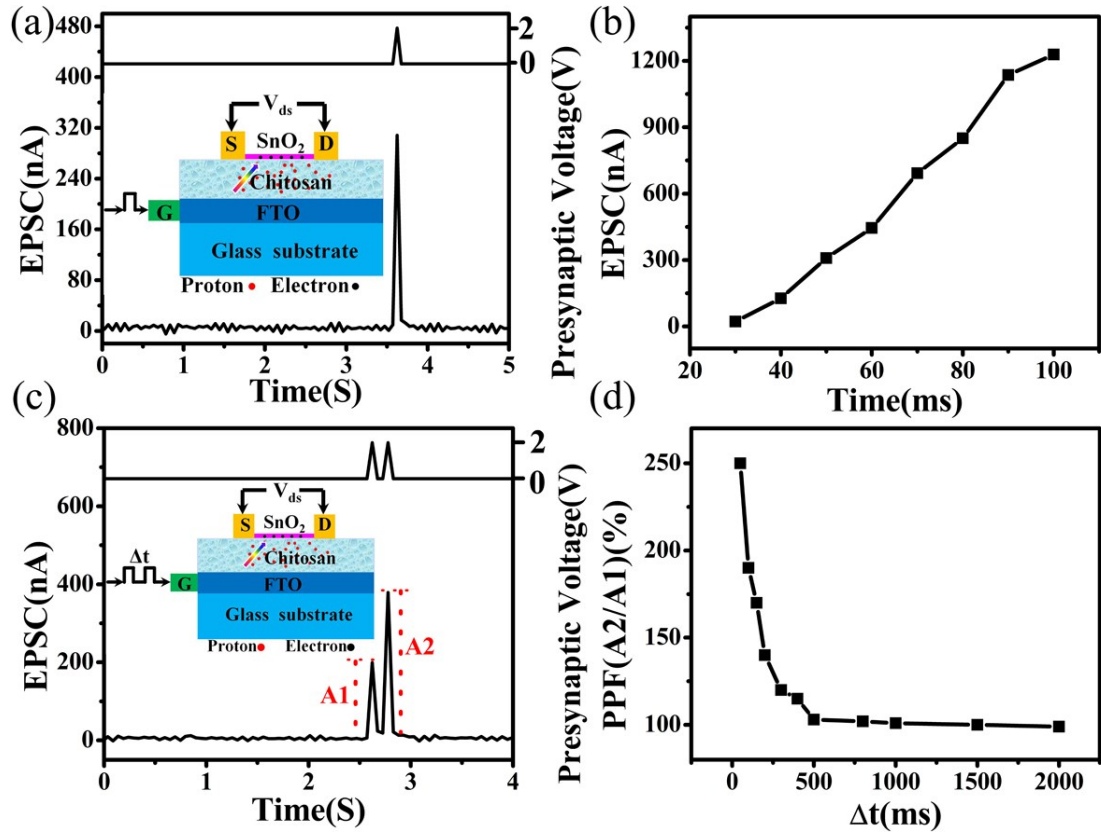

**Figure S3: Spike applied on the back gate:** (a) EPSC triggered by a presynaptic spike (2.0 V, 50 ms). EPSC is measured with a  $V_{ds}$  of 2.0 V. (b) Spike duration time-dependent EPSC, the amplitude of the spike is 2.0 V. (c) The EPSC triggered by a pair of presynaptic spikes with a time interval ( $\Delta t$ ) = 100 ms. A1 and A2 are the amplitudes of the first and second EPSC, respectively. (d) PPF index ( $100\% \times A2/A1$ ) plotted as a function of spike  $\Delta t$ .

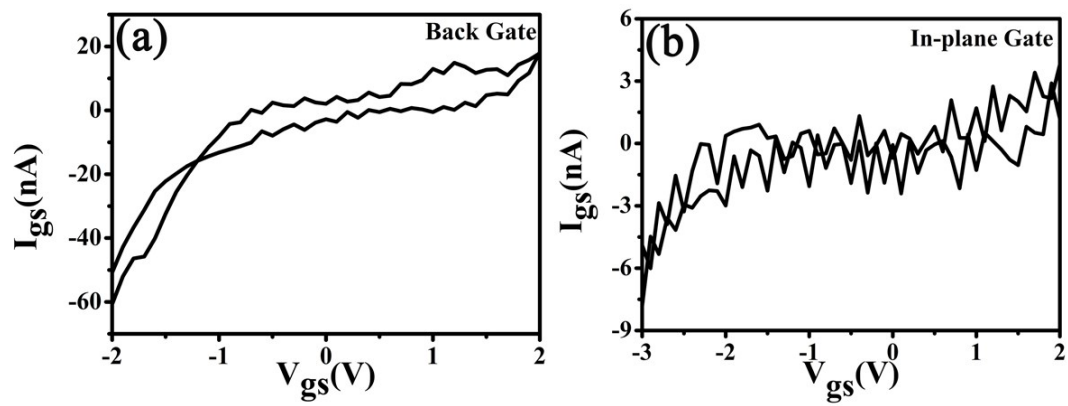

Figure S4: The leakage current of the chitosan film: (a) back-gated structure, (b) in-plane structure.

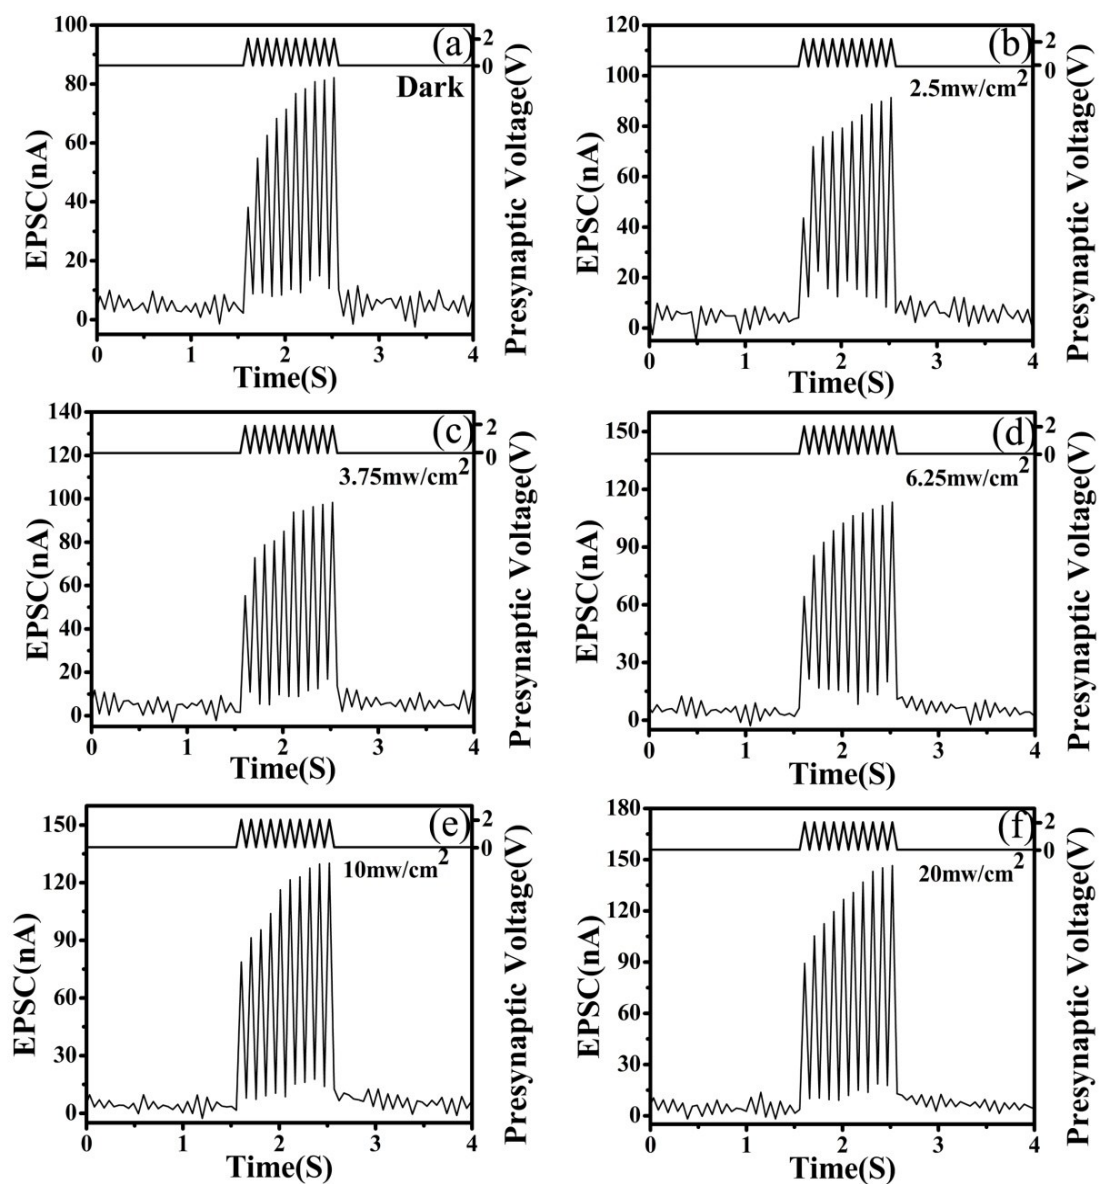

Figure S5: The EPSC recorded in response to the light intensity (365 nm): (a) dark, (b) 2.5  $\text{mW}/\text{cm}^2$ , (c) 3.75  $\text{mW}/\text{cm}^2$ , (d) 6.25  $\text{mW}/\text{cm}^2$ , (e) 10  $\text{mW}/\text{cm}^2$ , (f) 20  $\text{mW}/\text{cm}^2$ .

## References

- [1] C. G. A. Lima, R. S. D. Oliveira, C. F. Wehmann. *Materials Chemistry & Physics.*, **2006**, 99, 284-288.
- [2] G. P. Siddons, D. Merchin, J. H. Back, J. K. Jeong and M. Shim, *Nano Lett.*, **2004**, 4, 927-931.
- [3] P. Debye, *Chem. Rev.*, 1936, 19, 171–182.
